# Supplementary material for: Male African Elephant (Loxodonta africana) Behavioral Responses to Estrous Call Playbacks May Inform Conservation Management Tools
Source: Animals (Basel). 2022 May 1;12(9):1162. doi: 10.3390/ani12091162 (PMC9102362; doi:10.3390/ani12091162)
Supplement: Supplementary file 1 [file animals-12-01162-s001.zip › Animals-1639472-Supplemental Tables.xlsx]

## Sheet: Table S1
RaterCEO	RaterMNS
1	1
1	1
0.3125	0.25				Data set #1
1	0.5				Playback response scores by two raters (CEO, MNS).
0.75	0.625				Inter-rater reliability calculated using an Intraclass Correlation Coefficient (ICC). Details in section 2.6.
1	1
1	1
0.25	0.25
0.5	0.75
0.5	0
0.5	0.25
1	1
0.25	0.25
1	1
0.5	0.25
1	1
0.625	0.375
0.125	0.25
1	1

## Sheet: Table S2
MaleType	ResponseScore
musth4Q	1
nonmusth1Q-3Q	1
musth4Q	0.28125			Data set #2
nonmusth1Q-3Q	0.75			Final, averaged response scores for 19 individual males across 26 playback trials.
nonmusth4Q	0.6875			Graphically depicted in Figure 3, and later analyzed using an ANOVA and Tukey post hoc test (Table 3). Details in sections 2.4, 2.6, and 3.1.
musth4Q	1
nonmusth1Q-3Q	1
nonmusth4Q	0.25
nonmusth1Q-3Q	0.625
nonmusth4Q	0.25
nonmusth4Q	0.375
musth4Q	1
nonmusth4Q	0.25
nonmusth1Q-3Q	1
nonmusth1Q-3Q	0.375
musth4Q	1
nonmusth1Q-3Q	0.525
nonmusth4Q	0.1875
nonmusth1Q-3Q	1

## Sheet: Table S3
Time	DefecationRate
before	0.01533
before	3.95726e-06
before	4.84262e-06				Data set #3
before	1.07759e-05				Defecation rates before and after estrous playback for males with a response score of 1.
before	2.22025e-06				Graphically depicted in Figure 4a and analyzed using an exact Wilcoxon signed-rank test. Details in sections 2.4, 2.6, and 3.2.
before	2.59134e-06
before	5.09944e-06
before	2.04165e-06
before	1.94731e-06
before	0.0300908
before	5.52792e-06
before	3.43407e-06
before	3.03122e-06
before	4.5977e-06
before	0.0211057
before	2.46914e-06
before	0.00974566
before	5.33903e-06
after	2.88292e-05
after	3.19489e-05
after	1.3624e-05
after	1.75131e-05
after	2.33645e-05
after	2.95858e-05
after	3.01205e-05
after	0.189055
after	1.52924e-05
after	0.0476803
after	4.31034e-06
after	0.0556247
after	0.147861
after	0.0850425
after	0.0116929
after	0.0336281
after	0.0630273
after	2.05761e-05

## Sheet: Table S4
MaleType	Time	ObsTime	MusthRate	ResponseScore
musth4Q	before	18.09	1.10559	1
musth4Q	before	23.1	0.798663	0.2815
musth4Q	before	32.99	0.36375	1			Data set #5
musth4Q	before	196.06	0.868899	1			Rate of musth behaviors of musth adult elephants before and after estrous playbacks.
musth4Q	before	102.62	0.214384	1			Graphically depicted in Figure 4b and analyzed using an exact Wilcoxon signed-rank test. Details in sections 2.4, 2.6, and 3.2.
musth4Q	after	23.2	1.07759	1
musth4Q	after	4.03	0.146477	0.2815
musth4Q	after	20.29	0.345002	1
musth4Q	after	85.54	1.29491	1
musth4Q	after	47.6	0.252103	1

## Sheet: Table S5
MaleType	Time	ObsTime	MusthCount	MusthRate	ResponseScore
musth4Q	before	18.09	20	1.10559	1
musth4Q	before	32.99	12	0.36375	1
musth4Q	before	196.06	97	0.868898	1		Data set #6
musth4Q	before	102.62	22	0.214384	1		Rate of musth behaviors of musth adult elephants before and after estorus playbacks.
musth4Q	after	23.2	25	1.07759	1		An exact Wilcoxon signed-rank test revealed no significant difference in rate across time periods. Details in Supplemental R Script.
musth4Q	after	20.29	7	0.345002	1
musth4Q	after	85.54	67	1.29491	1
musth4Q	after	47.6	12	0.252103	1

## Sheet: Table S6
Elephant	MaleType	RaterCEO	RaterMNS
M1	musth4Q	1	1
M2	nonmusth1Q-3Q	1	1
M3	musth4Q	0.5	0.5		Data set #7
M3	musth4Q	0.25	0.25		Raw response scores for 19 individual males across 26 playback trials in 2008.
M4	nonmusth1Q-3Q	1	0.5		Details in sections 2.4, 2.6, and 3.1.
M5	nonmusth4Q	1	1
M6	musth4Q	1	1
M3	musth4Q	0	0
M7	nonmusth1Q-3Q	1	1
M8	nonmusth4Q	0.25	0.25
M9	nonmusth1Q-3Q	0.5	0.75
M10	nonmusth4Q	0.5	0
M11	nonmusth4Q	0.5	0.25
M12	musth4Q	1	1
M13	nonmusth4Q	0.25	0.25
M14	nonmusth1Q-3Q	1	1
M5	nonmusth4Q	0.5	0.25
M15	nonmusth1Q-3Q	0.5	0.25
M3	musth4Q	0.5	0.25
M16	musth4Q	1	1
M17	nonmusth1Q-3Q	1	0.5
M18	nonmusth4Q	0.25	0.25
M19	nonmusth1Q-3Q	1	1
M17	nonmusth1Q-3Q	0.25	0.25
M18	nonmusth4Q	0	0.25
M12	musth4Q	1	1
